# Supplementary material for: Brain-Specific Serine-47 Modification of Cytochrome c Regulates Cytochrome c Oxidase Activity Attenuating ROS Production and Cell Death: Implications for Ischemia/Reperfusion Injury and Akt Signaling
Source: PubMed Central journal article supplement (PMC7465522; doi:10.3390/cells9081843), 2020-08-06
Supplement: cells-09-01843-s001.pdf [file cells-09-01843-s001.pdf]

Supplementary Materials

**Brain-Specific Serine-47 Modification of Cytochrome *c* Regulates Cytochrome *c* Oxidase Activity Attenuating ROS Production and Cell Death: Implications for Ischemia/Reperfusion Injury and Akt Signaling**

Hasini A. Kalpage <sup>1</sup>, Junmei Wan <sup>1</sup>, Paul T. Morse <sup>1</sup>, Icksoo Lee <sup>2</sup>, Maik Hüttemann <sup>1,3,\*</sup>

<sup>1</sup> Center for Molecular Medicine and Genetics, Wayne State University, Detroit, MI 48201, USA

<sup>2</sup> College of Medicine, Dankook University, Cheonan-si, Chungcheongnam-do 31116, Republic of Korea

<sup>3</sup> Department of Biochemistry, Microbiology and Immunology, Wayne State University, Detroit, MI 48201, USA

\* Correspondence: mhuttema@med.wayne.edu; Tel.: (+1) 313-577-9150; Fax: (+1) 313-577-5218.

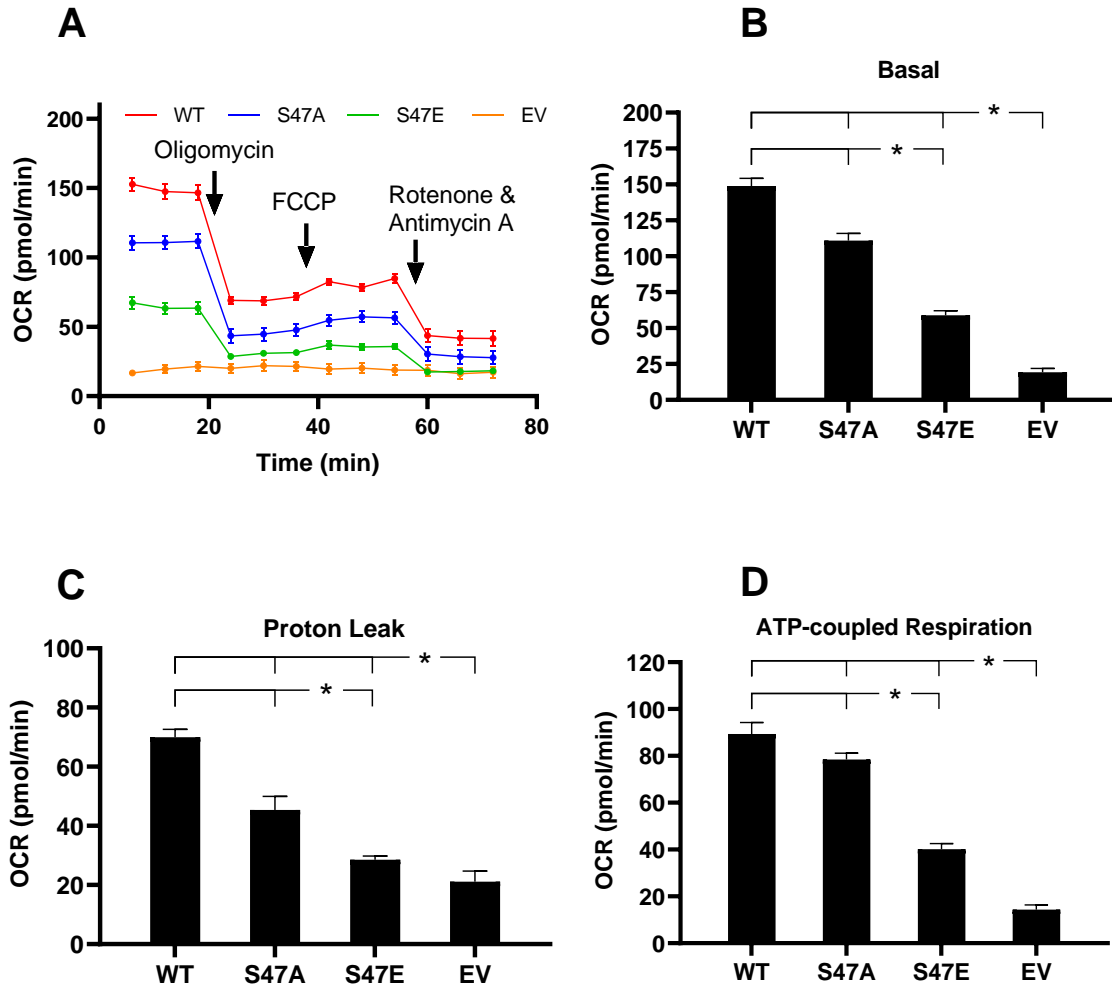

**Figure S1.** (A) Mitochondrial stress test of cells stably expressing EV and WT, S47A, S47E Cyt c in Seahorse media supplemented with 10 mM galactose (n = 5–6). FCCP addition does not result in the expected maximal respiration. (B) Basal mitochondrial respiration. (C) Proton leak (basal respiration not coupled to ATP production after addition of oligomycin). (D) ATP-coupled respiration in Seahorse media supplemented with 10 mM galactose. Data are represented as means  $\pm$  SEM, \*  $p < 0.05$ .

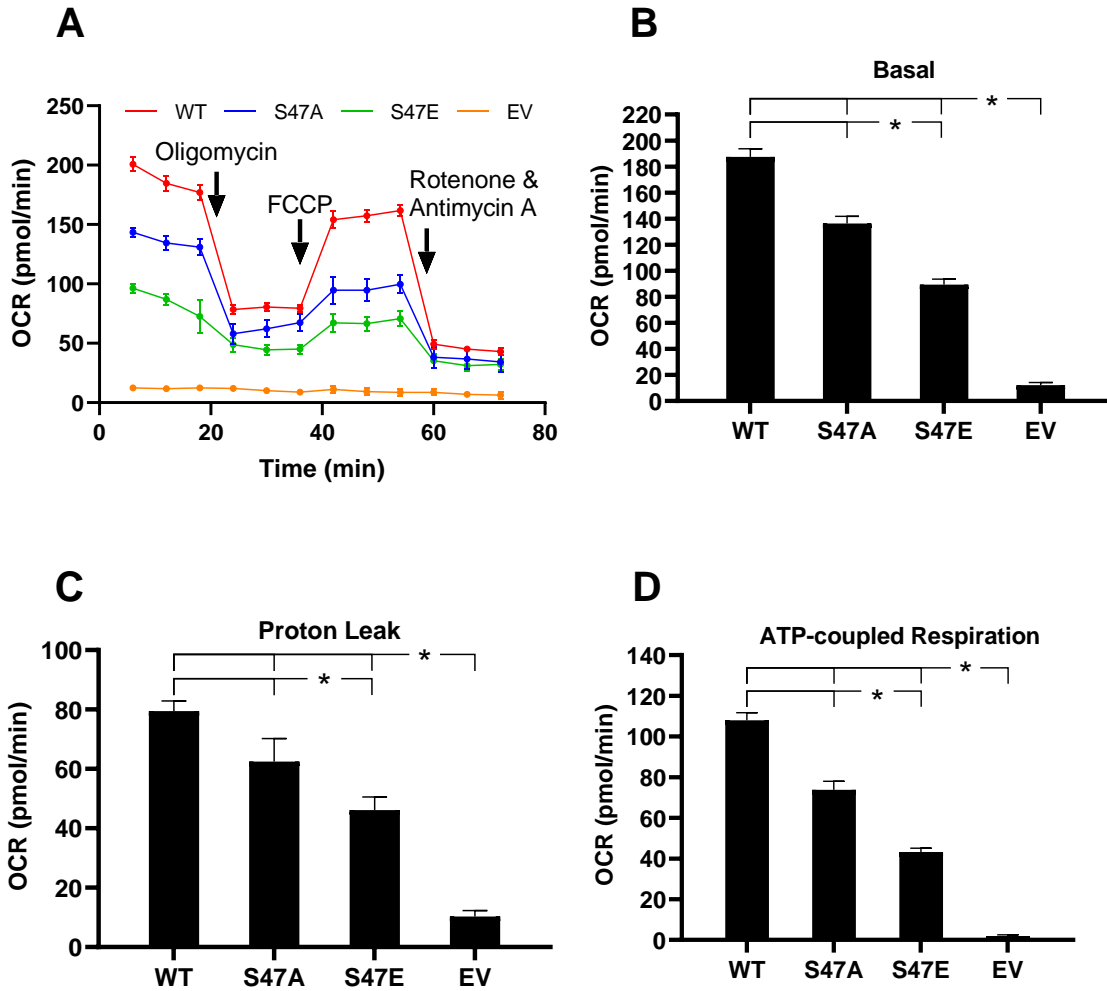

**Figure S2.** (A) Mitochondrial stress test of cells stably expressing EV and WT, S47A, S47E Cyt c in Seahorse media supplemented with 10 mM glucose and 10 mM sodium pyruvate ( $n = 5-6$ ). FCCP addition does not result in the expected increased respiration suggesting that the compound is toxic to lung embryonic fibroblast cells. (B) Basal mitochondrial respiration. (C) Proton leak (basal respiration not coupled to ATP production after addition of oligomycin). (D) ATP-coupled respiration in Seahorse media supplemented with 10 mM galactose. Data are represented as means  $\pm$  SEM, \*  $p < 0.05$ .

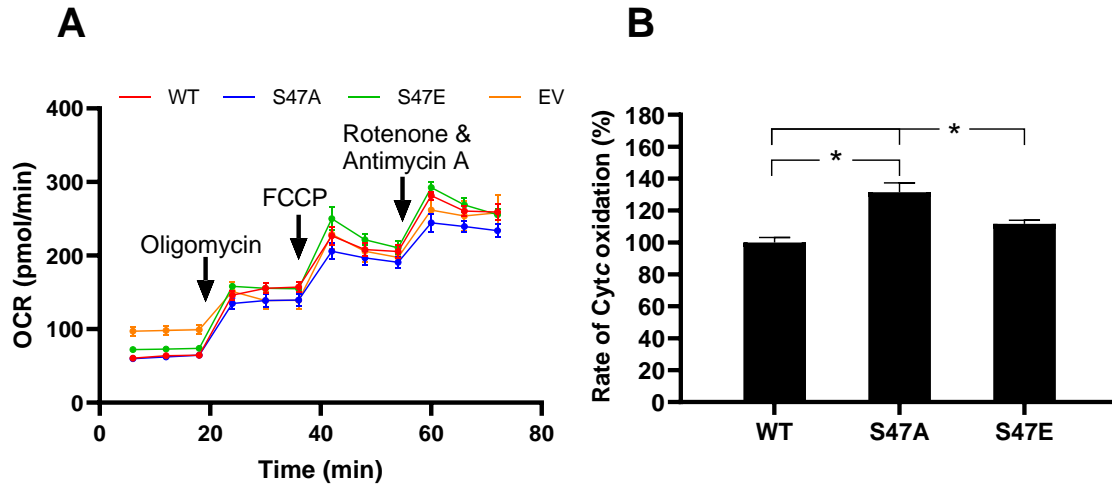

**Figure S3.** (A) Glycolysis stress test based on extracellular acidification rate (ECAR) of cells stably expressing EV and WT, S47A, S47E Cytc in Seahorse media supplemented with 10 mM glucose and 10 mM sodium pyruvate ( $n = 4-6$ ). (B) Rate of Cytc oxidation upon addition of 100  $\mu\text{M}$   $\text{H}_2\text{O}_2$  ( $n = 3$ ). Data are represented as means  $\pm$  SEM, \*  $p < 0.05$ .
